# Supplementary material for: Five-Year Cervical (Pre)Cancer Risk of Women Screened by HPV and Cytology Testing
Source: Oxford University Press journal article supplement (doi:10.1158/1940-6207.capr-14-0409), 2015-03-16
Supplement: 19406207capr140409-sup-140584_1_supp_2844934_nj33x3.docx [file 19406207capr140409-sup-140584_1_supp_2844934_nj33x3.docx]

**Legends for Supplementary Figure S1:**

**Title:** Cumulative incidence curves for CIN3+ of (A) women invited for the first time (29-33 years) and (B) older women (>34 years).

**Legend:** CIN=cervical intraepithelial neoplasia (grade 3 or higher); HPV=human papillomavirus; BMD=borderline/mild dyskaryosis.
